# Supplementary material for: Chemical colorimetric square wave and its derived logic gates based on tunable growth of plasmonic gold nanoparticles
Source: Royal Society of Chemistry journal article supplement (doi:10.1039/c4ra01928h), 2014-01-01
Supplement: c4ra01928h1.pdf [file c4ra01928h1.pdf]

**Chemical Colorimetric Square Wave and its Derived Logic  
Gates Based on Tunable Growth of Plasmonic Gold  
Nanoparticles**

Yanjuan Zhou, Kaiyu He, Shengquan Liu, Yong Li, Zhou Nie\*, Yan Huang, Shouzhao Yao

State Key Laboratory of Chemo/Biosensing and Chemometrics, College of Chemistry  
and Chemical Engineering, Hunan University, Changsha, 410082, P. R. China

Corresponding address: [niezhou.hnu@gmail.com](mailto:niezhou.hnu@gmail.com)

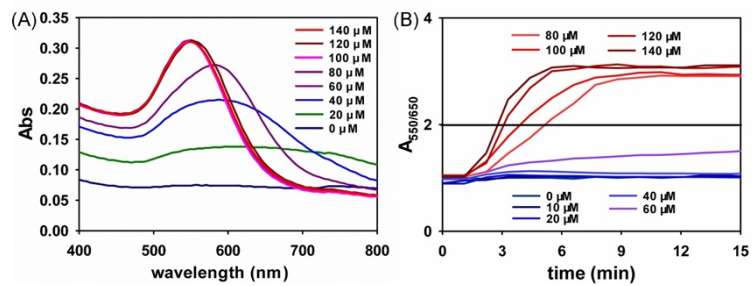

**Figure S1.** (A) The UV-Vis spectra of AuNPs solutions with different H<sub>2</sub>O<sub>2</sub> concentrations. (B) Variation of the values of A<sub>550/650</sub> with time after adding different concentrations of H<sub>2</sub>O<sub>2</sub> to the gold precursor solution.

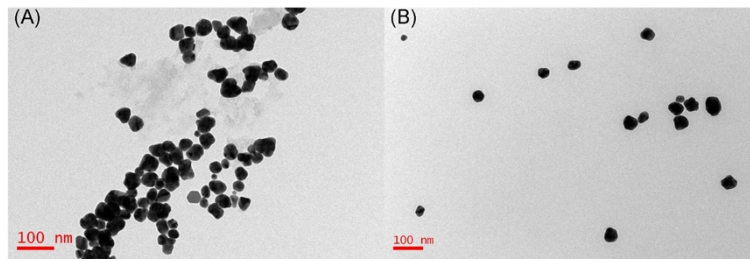

**Figure S2.** The TEM measurements performed to investigate the state of AuNPs obtained with different concentrations of  $\text{H}_2\text{O}_2$ . TEM images of AuNPs grown in the presence of (A)  $60 \mu\text{M}$   $\text{H}_2\text{O}_2$  and (B)  $80 \mu\text{M}$   $\text{H}_2\text{O}_2$ .

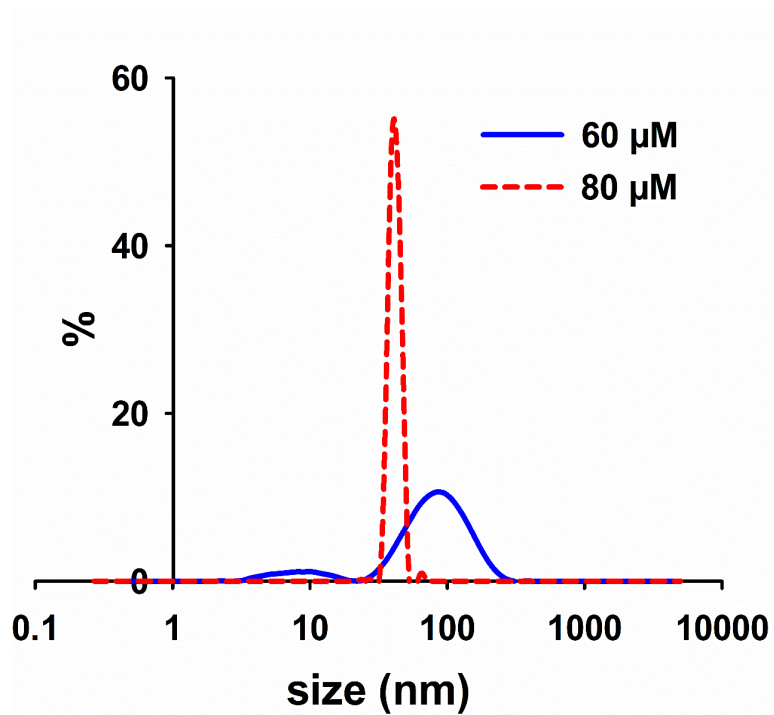

**Figure S3.** DLS analysis of AuNPs grown in the presence of H<sub>AuCl<sub>4</sub></sub> (0.1 mM), 60 μM H<sub>2</sub>O<sub>2</sub> or 80 μM H<sub>2</sub>O<sub>2</sub>.

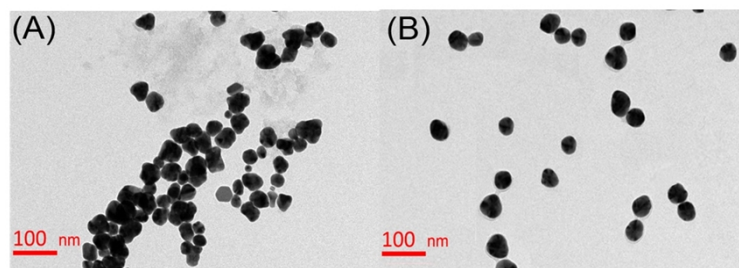

**Figure S4.** The TEM images of AuNPs obtained with or without  $\text{AgNO}_3$ . The reaction conditions: (A)  $\text{H}_2\text{O}_2$  (60  $\mu\text{M}$ ) and  $\text{HAuCl}_4$  (0.1 mM) in MES buffer (1 mM, pH 6.5); (B)  $\text{H}_2\text{O}_2$  (60  $\mu\text{M}$ ),  $\text{HAuCl}_4$  (0.1 mM) and  $\text{AgNO}_3$  (1  $\mu\text{M}$ ) in MES buffer (1 mM, pH 6.5).

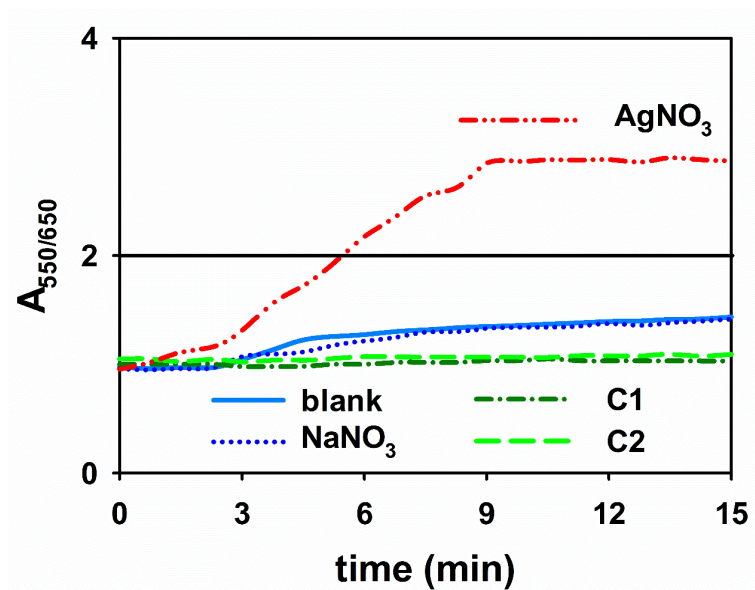

**Figure S5.** Variation of  $A_{550/650}$  of solutions with time obtained under different reaction conditions:  $AgNO_3$ :  $AgNO_3$  (1  $\mu M$ ),  $H_2O_2$  (60  $\mu M$ ) and  $HAuCl_4$  (0.1 mM); Blank: the control without  $AgNO_3$ ; C1: the control without  $H_2O_2$ ; C2: the control without  $HAuCl_4$ ;  $NaNO_3$ : the control using  $NaNO_3$  (1  $\mu M$ ) instead of  $AgNO_3$ .

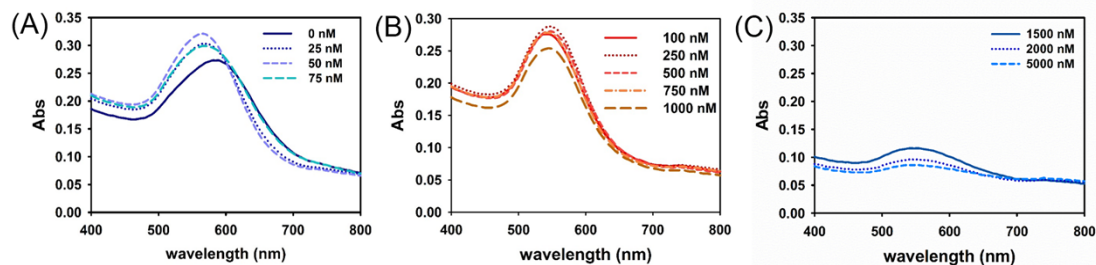

**Figure S6.** The UV-Vis spectra of AuNPs with 60  $\mu\text{M}$   $\text{H}_2\text{O}_2$  and different concentrations of  $\text{AgNO}_3$  (0  $\sim$  5  $\mu\text{M}$ ): (A) the first OFF interval of the  $\text{Ag}^+$ -CCSW (0  $\sim$  100 nM); (B) ON interval of the  $\text{Ag}^+$ -CCSW (100 nM  $\sim$  1  $\mu\text{M}$ ); (C) the second OFF interval of the  $\text{Ag}^+$ -CCSW (1  $\mu\text{M}$   $\sim$  5  $\mu\text{M}$ ).

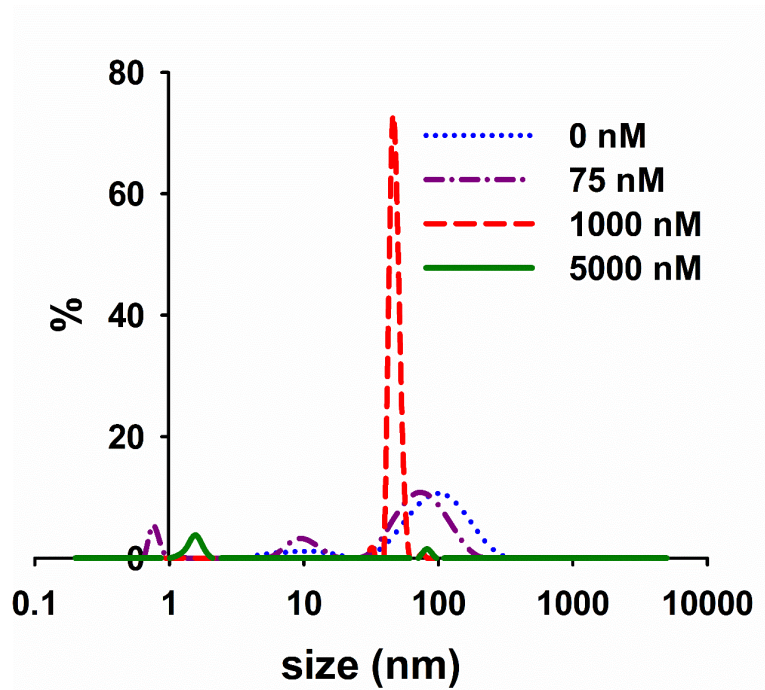

**Figure S7.** DLS analysis of AuNPs grown in the presence of H<sub>AuCl</sub><sub>4</sub> (0.1 mM), 60 μM H<sub>2</sub>O<sub>2</sub> and different concentrations of AgNO<sub>3</sub>.



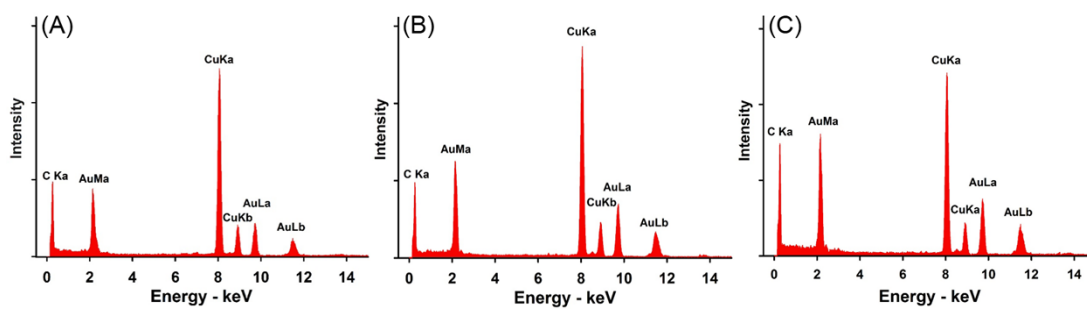

**Figure S8.** EDX analysis of AuNPs grown in the presence of different concentrations of  $\text{AgNO}_3$  (A:  $0.075 \mu\text{M}$ , B:  $1 \mu\text{M}$  and C:  $5 \mu\text{M}$ ) with  $\text{HAuCl}_4$  ( $0.1 \text{ mM}$ ) and  $\text{H}_2\text{O}_2$  ( $60 \mu\text{M}$ ).

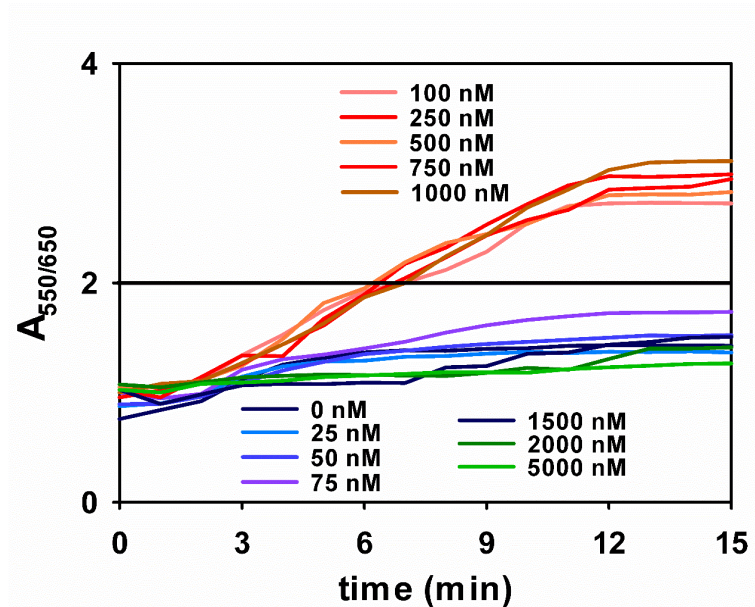

**Figure S9.** The variation of  $A_{550/650}$  of solutions with time obtained under different concentrations of  $Ag^+$ . The AuNPs formed under the following conditions:  $H_2O_2$  (60  $\mu M$ ),  $HAuCl_4$  (0.1 mM) and different concentrations of  $Ag^+$  (0 ~ 5  $\mu M$ ) in MES buffer (50 mM, pH 6.5). Only the solutions with the concentration of  $AgNO_3$  located in the ON interval of the  $Ag^+$ -CCSW (100 ~ 1000 nM) would lead to the  $A_{550/650}$  surpassing 2, otherwise the  $A_{550/650}$  below 2 was obtained with  $Ag^+$  concentration within the first OFF interval (0 ~ 100 nM) or the second OFF interval (1  $\mu M$  ~ 5  $\mu M$ ).

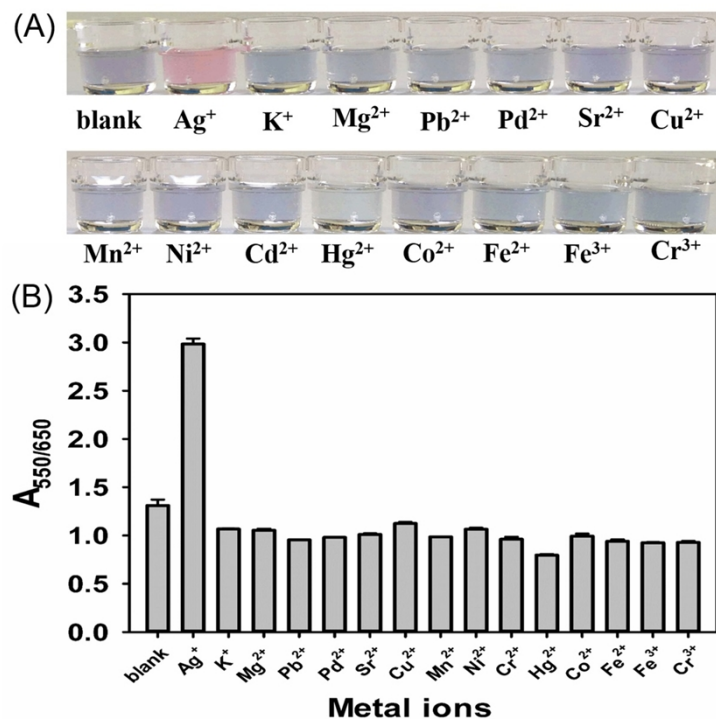

**Figure S10.** The selectivity of the metal ions for assisting the growth of AuNPs and constructing the CCSW. (A) Different color and (B) the absorption ratio value ( $A_{550/650}$ ) of AuNPs solution obtained with 60  $\mu\text{M}$   $\text{H}_2\text{O}_2$  and in the presence of 1  $\mu\text{M}$   $\text{Ag}^+$  and 1  $\mu\text{M}$  other metal ions, respectively.

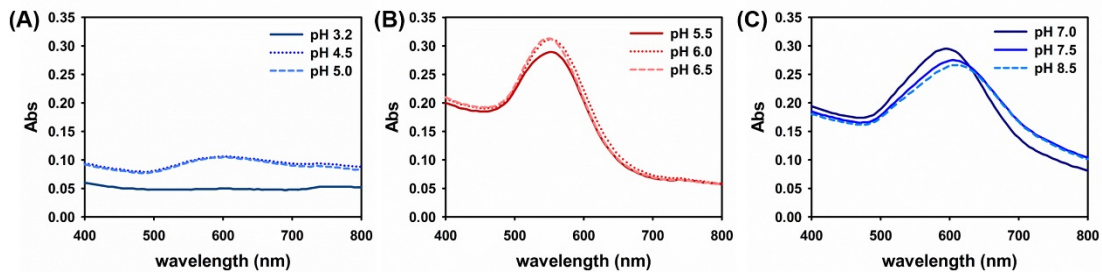

**Figure S11.** The UV-Vis spectra of AuNPs with 60  $\mu\text{M}$   $\text{H}_2\text{O}_2$  and 1  $\mu\text{M}$  of  $\text{AgNO}_3$  in MES buffer with different pH (pH 3.2 ~ 8.5): (A) the first OFF interval of the pH-CCSW (3.2 ~ 5.0); (B) ON interval of the pH-CCSW (5.5 ~ 6.5); (C) the second OFF interval of the pH-CCSW (7.0 ~ 8.5).

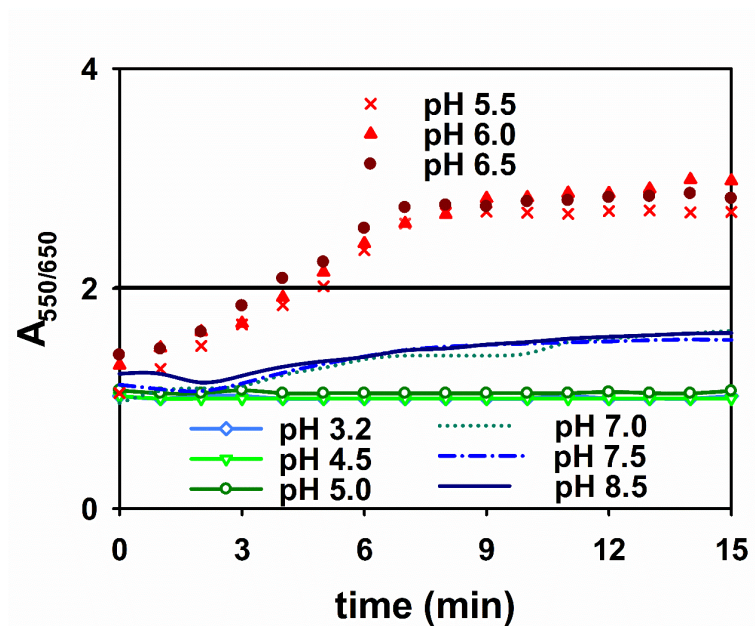

**Figure S12.** The variation of  $A_{550/650}$  of solutions with time obtained at different pH. The AuNPs formed under the following condition:  $\text{H}_2\text{O}_2$  (60  $\mu\text{M}$ ),  $\text{HAuCl}_4$  (0.1 mM) and  $\text{Ag}^+$  (1  $\mu\text{M}$ ) in MES buffer with different pH (50 mM, pH 3.2 ~ 8.5). Only the solutions with the pH located in the ON interval of pH-CCSW (pH 5.5 ~ 6.5) would lead to the  $A_{550/650}$  surpassing 2, otherwise the  $A_{550/650}$  below 2 was obtained with the pH within the first OFF interval (3.2 ~ 5.0) or the second OFF interval (7.0 ~ 8.5).

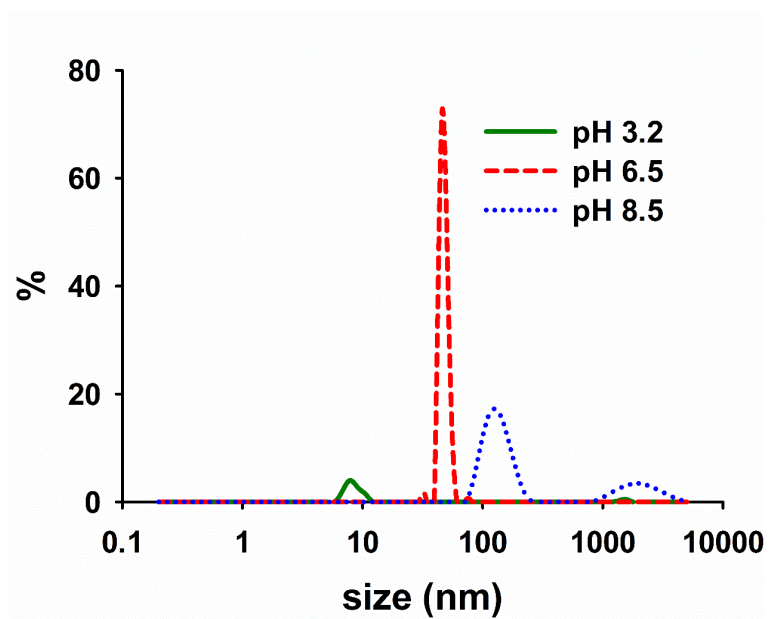

**Figure S13.** DLS analysis of AuNPs grown in the presence of H<sub>AuCl</sub><sub>4</sub> (0.1 mM), 60  $\mu$ M H<sub>2</sub>O<sub>2</sub> in MES buffer with different pH values.
